# Supplementary material
Source: PubMed Central journal article supplement (PMC4990173)
Supplement: TH-113-04-14080679-s001.pdf [file TH-113-04-14080679-s001.pdf]

## Supplementary Material to Jones et al. “Diversity and impact of rare variants in genes encoding the platelet G protein-coupled receptors” (Thromb Haemost 2015; 113.3)

Suppl. Table 1: URLs utilised in GPCR gene selection and analysis.

|                        |                                                                                                                                                             |
|------------------------|-------------------------------------------------------------------------------------------------------------------------------------------------------------|
| Ensembl Genome Browser | <a href="http://www.ensembl.org/">http://www.ensembl.org/</a>                                                                                               |
| Platelet Web           | <a href="http://plateletweb.bioapps.biozentrum.uni-wuerzburg.de/plateletweb.php">http://plateletweb.bioapps.biozentrum.uni-wuerzburg.de/plateletweb.php</a> |
| BioMart Resource       | <a href="http://www.ensembl.org/biomart/martview/">http://www.ensembl.org/biomart/martview/</a>                                                             |
| UniProt                | <a href="http://www.uniprot.org/">http://www.uniprot.org/</a>                                                                                               |
| GPCRDB                 | <a href="http://www.gpcr.org/7tm/">http://www.gpcr.org/7tm/</a>                                                                                             |
| PredictSNP             | <a href="http://loschmidt.chemi.muni.cz/predictsnp/">http://loschmidt.chemi.muni.cz/predictsnp/</a>                                                         |
| IUPHAR GPCR Database   | <a href="http://www.guidetopharmacology.org/GRAC">http://www.guidetopharmacology.org/GRAC</a>                                                               |
| Human Splice Finder    | <a href="http://www.umd.be/HSF/">http://www.umd.be/HSF/</a>                                                                                                 |

**Suppl. Table 2: Functionally significant motifs or key structural residues in target GPCRs.**

| <b>Feature</b>                     | <b>Description</b>                                                                        | <b>Position of key interactions</b>                                                                                                                                                                                                                               |
|------------------------------------|-------------------------------------------------------------------------------------------|-------------------------------------------------------------------------------------------------------------------------------------------------------------------------------------------------------------------------------------------------------------------|
| <b>The inter-TM helix scaffold</b> | a conformation-independent , non-covalent network of interactions conserved amongst GPCRs | 36 positions are involved; Asn <sup>1.50</sup> , Asp <sup>2.50</sup> , Trp <sup>4.50</sup> , Pro <sup>7.50</sup> are highly conserved across class A GPCRs                                                                                                        |
| <b>TM3 structural hub</b>          | TM3 is an essential hub for the inter-helical network of conserved interactions           | Almost all positions in TM3 participate in the consensus binding network; a conserved disulphide bond Cys <sup>3.25</sup> & Cys in ECL2                                                                                                                           |
| <b>Ligand binding cradle</b>       | the extracellular face of TM helices that form the bottom of the ligand binding pocket    | positions 3.32, 3.33, 3.36, 6.48, 6.51 & 7.39                                                                                                                                                                                                                     |
| <b>Intracellular loop 2 (IL2)</b>  | contains the E/DRY motif that participates in the 'ionic lock' in some GPCRs              | Arg in ICL2 forms salt bridge with Asp <sup>3.49</sup> of the E/DRY motif in TM3 in several receptors; Arg <sup>3.50</sup> of the E/DRY motif interacts with Glu <sup>6.30</sup> to form the ionic lock in some GPCRs; interacts with G protein after activation. |
| <b>G-protein binding region</b>    | the intracellular face of the TM helices that make contact with G-proteins                | positions 3.50, 3.53, 3.54, 5.61, 5.64, 5.65, 6.33 & 6.36 (based upon overlap between rhodopsin-G <sub>t</sub> peptide and β <sub>2</sub> -AR-G <sub>s</sub> structures)                                                                                          |
| <b>The transmission switch</b>     | rearrangement of these residues upon activation                                           | positions 3.40, 5.51, 6.44 & 6.48                                                                                                                                                                                                                                 |

**Suppl. Table 3: Master list of all damaging SNVs in population data set.**

See separate file TH113.3\_Jones\_Suppl\_Table3
